# Supplementary material for: Documentary evidence of urban droughts and their impact in the eastern Netherlands: the cases of Deventer and Zutphen, 1500–1795
Source: Copernicus journal article supplement (doi:10.5194/cp-20-1721-2024), 2024-08-02
Supplement: Supplementary file 1 [file cp-20-1721-2024-supplement.pdf]

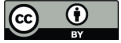

*Supplement of*

## **Documentary evidence of urban droughts and their impact in the eastern Netherlands: the cases of Deventer and Zutphen, 1500–1795**

**Dániel Johannes Moerman**

*Correspondence to:* Dániel Johannes Moerman (d.j.moerman@vu.nl)

The copyright of individual parts of the supplement might differ from the article licence.

**Table S1:** Overview of drought events from Deventer (D) and Zutphen (Z), 1500-1795

| Year | Month                     | Season                    | Location             | HSDS ranking    | Source                        | Descriptions from the sources                                                                                                                                                                                 |
|------|---------------------------|---------------------------|----------------------|-----------------|-------------------------------|---------------------------------------------------------------------------------------------------------------------------------------------------------------------------------------------------------------|
| 1534 | uncertain                 | Summer                    | Deventer             | 3               | HCO (0690, 135;1)             | Great drought and a lack of water, ordinance calls for storing water in barrels in case of a fire                                                                                                             |
| 1556 | September                 | Autumn                    | Deventer             | 3               | HCO (0690, 135;3)             | Period of drought and a lack of water, calls for storing water in barrels in case of a fire                                                                                                                   |
| 1588 | January                   | Winter                    | Zutphen              | 4               | ZuRAZ (0001;2)                | Period of drought and use of the watermills only permitted after rainfall returns                                                                                                                             |
| 1589 | December                  | Winter                    | Zutphen              | 3               | ZuRAZ (0001;2)                | Low water levels, no navigation possible to the city                                                                                                                                                          |
| 1597 | March                     | Autumn                    | Zutphen              | 2               | ZuRAZ (0001;3)                | low water levels, limited navigation                                                                                                                                                                          |
| 1612 | July                      | Summer                    | Deventer             | 3               | HCO (0691;7a)                 | Period of drought and low water levels on the IJssel, a lack of water in wells and an ordinance calls for storing water in barrels in case of a fire                                                          |
| 1615 | September (D) and May (Z) | Autumn (D) and Spring (Z) | Deventer and Zutphen | 3 (D) and 2 (Z) | HCO (0691;6a); ZuRAZ (0001;6) | Period of drought, request from the sworn men in Deventer to issue an ordinance requiring the inhabitants to store water                                                                                      |
| 1629 | August                    | Summer                    | Deventer and Zutphen | 3               | HCO (0691; 7b);ZuRAZ (0001;8) | Period of drought and low water, limited to no use of watermills (and windmills) and increased use of draught mills in Zutphen, an ordinance calls for storing water in barrels in case of a fire in Deventer |
| 1630 | December                  | Winter                    | Deventer             | 2               | HCO (0691; 6b)                | Period of low water, request from the sworn men to construct a palisade as extra protection of the city due to the low water mark in the IJssel                                                               |
| 1633 | September                 | Autumn                    | Deventer             | 3               | HCO (0691; 7b)                | Period of major drought, low water marks and an ordinance calls for storing water in barrels in case of a fire                                                                                                |
| 1634 | March                     | Spring                    | Deventer             | 4               | HCO (0691; 6b)                | Period of drought, low water addressed by the sworn men to deepen the city's harbour, lack of wind and water necessitates to prepare the draught mill                                                         |

|             |           |        |                            |                    |                                          |                                                                                                                                                                                                                        |
|-------------|-----------|--------|----------------------------|--------------------|------------------------------------------|------------------------------------------------------------------------------------------------------------------------------------------------------------------------------------------------------------------------|
| <b>1638</b> | August    | Summer | Deventer                   | 3                  | HCO<br>(0691; 7b)                        | Period of drought, low water levels and a lack of water in wells, an ordinance calls for storing water in barrels in case of a fire in Deventer                                                                        |
| <b>1645</b> | August    | Summer | Deventer                   | 3                  | HCO<br>(0691; 7b)                        | Period of drought, lack of water in wells, an ordinance calls for storing water in barrels in case of a fire                                                                                                           |
| <b>1650</b> | June      | Summer | Deventer                   | 4                  | HCO<br>(0691;<br>14.4)                   | Period of drought, lack of water, watermills unable to function                                                                                                                                                        |
| <b>1652</b> | May       | Spring | Deventer                   | 3                  | HCO<br>(0691;<br>7b/14.4)                | Period of drought, lack of water, an ordinance calls for storing water in barrels in case of a fire, use of water from a nearby brook to wet the St. Jurriensdijk instead of water from the dried out Schipbeek        |
| <b>1662</b> | October   | Autumn | Deventer                   | 3                  | HCO<br>(0691; 7b)                        | Lack of water in the city's wells, ban on lighting fireworks and an ordinance calls for storing water in barrels in case of a fire                                                                                     |
| <b>1666</b> | July      | Summer | Deventer                   | 3                  | HCO<br>(0691; 7c)                        | Period of drought and an ordinance calls for storing water in barrels in case of a fire                                                                                                                                |
| <b>1667</b> | August    | Summer | Zutphen                    | 3                  | ZuRAZ<br>(0001;18)                       | Lack of water in the city, fear for fires, ban on lighting fireworks or celebratory pitch barrels                                                                                                                      |
| <b>1669</b> | September | Autumn | Deventer<br>and<br>Zutphen | 4 (D) and<br>3 (Z) | HCO<br>(0691; 7c);<br>ZuRAZ<br>(0001;18) | Extraordinary drought, unusually low water levels and a lack of water in the wells of Deventer leading to an enforced deepening of wells, an ordinance calls for storing water in barrels in case of a fire in Zutphen |
| <b>1672</b> | January   | Winter | Deventer                   | 3                  | HCO<br>(0691; 7c)                        | Low water levels in the rivers, a lack of water in wells, storing water in barrels                                                                                                                                     |
| <b>1690</b> | May       | Spring | Deventer                   | 3                  | HCO<br>(0691; 7c)                        | Period of drought, an ordinance calls for storing water in barrels in case of a fire                                                                                                                                   |
| <b>1696</b> | December  | Winter | Deventer                   | 3                  | HCO<br>(0691; 7c)                        | Lack of water in the city, ban on certain activities causing fire hazards                                                                                                                                              |
| <b>1731</b> | November  | Winter | Deventer                   | 3                  | HCO<br>(0691; 7d)                        | Waterless period, general lack of water in the city, an ordinance calls for storing water in barrels in case of a fire                                                                                                 |

|             |                                 |                           |                      |             |                                   |                                                                                                                                                                                                                                                                                |
|-------------|---------------------------------|---------------------------|----------------------|-------------|-----------------------------------|--------------------------------------------------------------------------------------------------------------------------------------------------------------------------------------------------------------------------------------------------------------------------------|
| <b>1733</b> | uncertain (D) and September (Z) | Summer (D) and autumn (Z) | Deventer and Zutphen | 3 (D) 4 (Z) | HCO (0691; 4.28) ZuRAZ (0001;32)  | Dry summer, low water levels and a lack of water in wells and pumps in Zutphen, deepening of the waterways near Deventer                                                                                                                                                       |
| <b>1749</b> | October and December            | autumn/winter             | Zutphen              | 3           | ZuRAZ (0001;35)                   | Extraordinary low water levels on the IJssel river, a lack of peat due to hampered navigation                                                                                                                                                                                  |
| <b>1753</b> | June (D) and September (Z)      | Summer (D) and autumn (Z) | Deventer and Zutphen | 4           | HCO (0691; 7e) ZuRAZ (0001;37)    | Excessive drought, low water levels, many wells without water, an ordinance calls for storing water in barrels in case of a fire                                                                                                                                               |
| <b>1772</b> | December (D) and October (Z)    | Autumn (D) and winter (Z) | Deventer and Zutphen | 3           | HCO (0691; 7f); ZuRAZ (0001;46)   | Long-lasting lack of water in the rivers, lack of water in wells and pumps, requests to limit water use                                                                                                                                                                        |
| <b>1779</b> | April (D) and February (Z)      | Winter (D) and spring (Z) | Deventer and Zutphen | 4           | HCO (0691; 7f); ZuRAZ (0001;49)   | Long-lasting lack of water in the rivers, many wells without water, ban on certain water-using activities, no navigation possible to Zutphen, outbreaks of dysentery in Zutphen                                                                                                |
| <b>1781</b> | March (D) and February (Z)      | Winter (D) and spring (Z) | Deventer and Zutphen | 4           | HCO (0691; 4.43); ZuRAZ (0001;50) | Long-lasting drought and low water levels in the rivers, no navigation and watermills out of use specifically in Zutphen                                                                                                                                                       |
| <b>1783</b> | August (D) and July/August (Z)  | Summer                    | Deventer and Zutphen | 4           | HCO (0691; 7f); ZuRAZ (0001;52)   | Excessive drought, lack of water in the rivers, many wells without water, watermills out of use, limited yields of buckwheat near Deventer as a result of drought, an ordinance calls for storing water in barrels in case of a fire and outbreaks of dysentery in both cities |
| <b>1790</b> | April                           | Spring                    | Deventer             | 3           | HCO (0691; 7g)                    | Strong drought, many wells without water, ordinance to limit water use.                                                                                                                                                                                                        |
| <b>1793</b> | October                         | Autumn                    | Zutphen              | 3           | ZuRAZ (0001.122)                  | Very low water levels, lack of water, ban on using water from the communal wells for scrubbing of streets                                                                                                                                                                      |
| <b>1794</b> | January                         | Winter                    | Zutphen              | 3           | ZuRAZ (0001.122)                  | Very low water levels, lack of water, ban on using water from the communal wells for scrubbing of streets                                                                                                                                                                      |
